# Supplementary material for: Susceptibility of Chickens to Low Pathogenic Avian Influenza (LPAI) Viruses of Wild Bird– and Poultry–Associated Subtypes
Source: MDPI journal article supplement (doi:10.3390/v11111010), 2019-10-31
Supplement: s1 [file s1]

**Table S4. Oropharyngeal shedding.** The ratio of chickens positive for viral shedding through the oropharyngeal (OP) route to the number of virus-inoculated chickens. The chickens inoculated by the intranasal (IN) and intratracheal (IT) route with eight strains of low pathogenic avian influenza (LPAI) viruses ( $10^{5.3}$  median egg infectious dose (EID<sub>50</sub>) per bird). The swabs were taken daily from live birds to 7 days post inoculation (dpi) for virus detection by influenza virus-specific PCR (M-PCR). Viral titres for positive samples are expressed as the mean equivalent log<sub>10</sub> EID<sub>50</sub>/ml titre  $\pm$  standard deviation (SD). The onset of viral shedding was calculated based on the positive swabs and is reported as mean dpi  $\pm$  SD.

| Virus group      | 0 dpi | 1 dpi                 | 2 dpi                 | 3 dpi                | 4 dpi               | 5 dpi               | 6 dpi               | 7 dpi     | Total                 | Onset of viral shedding (dpi) |
|------------------|-------|-----------------------|-----------------------|----------------------|---------------------|---------------------|---------------------|-----------|-----------------------|-------------------------------|
| H3N8 NS allele A | 0/20  | 9/20 (4.0 $\pm$ 1.2)  | 6/16 (3.7 $\pm$ 0.8)  | 4/12 (2.7 $\pm$ 0.4) | 3/8 (3.1 $\pm$ 0.8) | 7/8 (3.0 $\pm$ 0.8) | 2/4 (2.5 $\pm$ 0.1) | 1/4 (2.3) | 12/20 (3.6 $\pm$ 0.9) | 1.8 $\pm$ 1.4                 |
| H3N8 NS allele B | 0/20  | 13/20 (4.7 $\pm$ 1.2) | 9/16 (4.8 $\pm$ 1.1)  | 4/12 (4.1 $\pm$ 1.4) | 4/8 (4.2 $\pm$ 1.5) | 0/8                 | 0/4                 | 0/4       | 17/20 (4.6 $\pm$ 1.2) | 1.2 $\pm$ 0.5                 |
| H4N6 NS allele A | 0/20  | 15/20 (4.8 $\pm$ 1.1) | 9/16 (3.8 $\pm$ 0.9)  | 0/12                 | 1/8 (2.8)           | 1/8 (3.0)           | 1/4 (3.0)           | 0/4       | 19/20 (4.3 $\pm$ 1.1) | 1.5 $\pm$ 1.4                 |
| H4N6 NS allele B | 0/20  | 15/20 (4.7 $\pm$ 1.2) | 12/16 (4.9 $\pm$ 0.8) | 5/12 (4.0 $\pm$ 1.2) | 4/8 (4.6 $\pm$ 0.7) | 3/8 (4.2 $\pm$ 0.6) | 1/4 (5.2)           | 0/4       | 16/20 (4.7 $\pm$ 1.0) | 1.1 $\pm$ 0.3                 |
| H8N4 NS allele A | 0/20  | 5/20 (2.4 $\pm$ 0.9)  | 0/16                  | 0/12                 | 0/8                 | 1/8 (1.9)           | 1/4 (1.8)           | 0/4       | 7/20 (2.5 $\pm$ 0.9)  | 2.3 $\pm$ 2.2                 |
| H8N4 NS allele B | 0/20  | 0/20                  | 0/16                  | 0/12                 | 0/8                 | 0/8                 | 0/4                 | 0/4       | 0/20                  | na                            |
| H9N2 NS allele A | 0/20  | 1/20 (2.7)            | 1/16 (1.9)            | 0/12                 | 0/8                 | 0/8                 | 0/4                 | 0/4       | 4/20 (2.3 $\pm$ 0.5)  | 1.3 $\pm$ 0.5                 |
| H9N2 NS allele B | 0/20  | 4/20 (2.5 $\pm$ 0.4)  | 1/16 (3.1)            | 1/12 (2.4)           | 0/8                 | 0/8                 | 0/4                 | 0/4       | 6/20 (2.6 $\pm$ 0.4)  | 1.2 $\pm$ 0.4                 |

OP, oropharyngeal; dpi, days post inoculation; NS, nonstructural protein
