# Supplementary material for: Susceptibility of Chickens to Low Pathogenic Avian Influenza (LPAI) Viruses of Wild Bird– and Poultry–Associated Subtypes
Source: MDPI journal article supplement (doi:10.3390/v11111010), 2019-10-31
Supplement: s1 [file s1]

**Table S3. Influenza virus-specific antibody detection.** The ratio of antibody-positive chickens to the number of virus-inoculated chickens as determined by influenza-specific ELISA and subtype-specific hemagglutinin inhibition (HI) tests. Serum samples taken at 5 and 7 days post inoculation (dpi) are shown. The HI titres are expressed as the mean  $\log_2$  values  $\pm$  standard deviation (SD).

| Virus group      | ELISA positives |       | HI test positives (titre) <sup>a</sup> |                     |
|------------------|-----------------|-------|----------------------------------------|---------------------|
|                  | 5 dpi           | 7 dpi | 5 dpi                                  | 7 dpi               |
| H3N8 NS allele A | 0/4             | 2/4   | 0/4                                    | 1/4 (3)             |
| H3N8 NS allele B | 0/4             | 2/4   | 0/4                                    | 1/4 (3)             |
| H4N6 NS allele A | 0/4             | 1/4   | 0/4                                    | 0/4                 |
| H4N6 NS allele B | 0/4             | 4/4   | 0/4                                    | 0/4                 |
| H8N4 NS allele A | 4/4             | 3/4   | 3/4 (4.3 $\pm$ 0.6)                    | 2/4 (5.0 $\pm$ 0.0) |
| H8N4 NS allele B | 0/4             | 0/4   | 0/4                                    | 0/4                 |
| H9N2 NS allele A | 1/4             | 3/4   | 0/4                                    | 0/4                 |
| H9N2 NS allele B | 0/4             | 1/4   | 0/4                                    | 0/4                 |

dpi, days post inoculation; HI, hemagglutination inhibition; NS, nonstructural protein

<sup>a</sup> HI titres of 3  $\log_2$  or higher were considered positive.
