# Supplementary material for: Susceptibility of Chickens to Low Pathogenic Avian Influenza (LPAI) Viruses of Wild Bird– and Poultry–Associated Subtypes
Source: MDPI journal article supplement (doi:10.3390/v11111010), 2019-10-31
Supplement: s1 [file s1]

**Table S5. Cloacal shedding.** The ratio of chickens positive for viral shedding through the cloacal (CL) route to the number of virus-inoculated chickens. The chickens inoculated by the intranasal (IN) and intratracheal (IT) route with eight strains of low pathogenic avian influenza (LPAI) viruses ( $10^{5.3}$  median egg infectious dose (EID<sub>50</sub>) per bird). The swabs were taken daily from live birds to 7 days post inoculation (dpi) for virus detection by influenza virus-specific PCR (M-PCR). Viral titres for positive samples are expressed as the mean equivalent log<sub>10</sub> EID<sub>50</sub>/ml titre  $\pm$  standard deviation (SD). The onset of viral shedding was calculated based on the positive swabs and is reported as mean dpi  $\pm$  SD.

| Virus group      | 0 dpi | 1 dpi | 2 dpi      | 3 dpi                | 4 dpi               | 5 dpi               | 6 dpi               | 7 dpi               | Total                | Onset of viral shedding (dpi) |
|------------------|-------|-------|------------|----------------------|---------------------|---------------------|---------------------|---------------------|----------------------|-------------------------------|
| H3N8 NS allele A | 0/20  | 0/20  | 1/16 (6.3) | 1/12 (6.6)           | 2/8 (4.9 $\pm$ 2.7) | 1/8 (6.2)           | 1/4 (4.8)           | 2/4 (3.7 $\pm$ 1.0) | 2/20 (5.1 $\pm$ 1.6) | 3.0 $\pm$ 1.4                 |
| H3N8 NS allele B | 0/20  | 0/20  | 1/16 (7.9) | 3/12 (4.7 $\pm$ 2.4) | 2/8 (6.1 $\pm$ 0.3) | 2/8 (5.9 $\pm$ 0.6) | 2/4 (4.7 $\pm$ 2.3) | 2/4 (6.8 $\pm$ 0.4) | 7/20 (6.0 $\pm$ 1.3) | 4.1 $\pm$ 1.8                 |
| H4N6 NS allele A | 0/20  | 0/20  | 0/16       | 0/12                 | 0/8                 | 0/8                 | 0/4                 | 0/4                 | 0/20                 | na                            |
| H4N6 NS allele B | 0/20  | 0/20  | 0/16       | 0/12                 | 0/8                 | 0/8                 | 0/4                 | 0/4                 | 0/20                 | na                            |
| H8N4 NS allele A | 0/20  | 0/20  | 0/16       | 1/12 (4.9)           | 2/8 (3.5 $\pm$ 1.1) | 2/8 (5.5 $\pm$ 0.2) | 2/4 (4.6 $\pm$ 0.3) | 2/4 (4.9 $\pm$ 0.6) | 3/20 (4.7 $\pm$ 0.9) | 4.0 $\pm$ 1.0                 |
| H8N4 NS allele B | 0/20  | 0/20  | 0/16       | 0/12                 | 0/8                 | 0/8                 | 0/4                 | 0/4                 | 0/20                 | na                            |
| H9N2 NS allele A | 0/20  | 0/20  | 0/16       | 0/12                 | 0/8                 | 0/8                 | 0/4                 | 0/4                 | 0/20                 | na                            |
| H9N2 NS allele B | 0/20  | 0/20  | 0/16       | 0/12                 | 0/8                 | 0/8                 | 0/4                 | 0/4                 | 0/20                 | na                            |

CL, cloacal; dpi, days post inoculation; NS, nonstructural protein
