# Supplementary material for: Susceptibility of Chickens to Low Pathogenic Avian Influenza (LPAI) Viruses of Wild Bird– and Poultry–Associated Subtypes
Source: MDPI journal article supplement (doi:10.3390/v11111010), 2019-10-31
Supplement: s1 [file s1]

**Table S1. Viruses used in the infection experiment.** Low pathogenic avian influenza (LPAI) viruses used in this study, including the isolate identification numbers as listed in GISAID's EpiFlu database (<http://www.gisaid.org>). The viruses were collected from wild ducks as part of the national avian influenza (AI) virus surveillance program in wild birds in the Netherlands.

| <b>Virus</b>     | <b>Isolate name</b>                  | <b>GISAID isolate ID</b> |
|------------------|--------------------------------------|--------------------------|
| H3N8 NS allele A | A/Mallard/Netherlands/17/2011        | EPI_ISL_243527           |
| H3N8 NS allele B | A/Mallard/Netherlands/30/2010        | EPI_ISL_243634           |
| H4N6 NS allele A | A/Mallard/Netherlands/7/2011         | EPI_ISL_243399           |
| H4N6 NS allele B | A/Mallard/Netherlands/26/2010        | EPI_ISL_243498           |
| H8N4 NS allele A | A/Mallard/Netherlands/1/2006         | EPI_ISL_33854            |
| H8N4 NS allele B | A/Mallard/Netherlands/11/2006        | EPI_ISL_267765           |
| H9N2 NS allele A | A/Mallard/Netherlands/19/2005        | EPI_ISL_267193           |
| H9N2 NS allele B | A/Eurasian wigeon/Netherlands/3/2005 | EPI_ISL_64643            |
