# Supplementary material for: Susceptibility of Chickens to Low Pathogenic Avian Influenza (LPAI) Viruses of Wild Bird– and Poultry–Associated Subtypes
Source: Viruses. 2019 Oct 31;11(11):1010. doi: 10.3390/v11111010 (PMC6893415; doi:10.3390/v11111010)
Supplement: Supplementary file 1 [file viruses-11-01010-s001.zip]

Archive with 5 entries (5 files):
- Table S1.pdf
- Table S2_revised.pdf
- Table S3.pdf
- Table S4_revised.pdf
- Table S5_revised.pdf
